# Icariside II activates EGFR-Akt-Nrf2 signaling and protects osteoblasts from dexamethasone

Weidong Liu<sup>1,\*</sup>, Li Mao<sup>2,\*</sup>, Feng Ji<sup>1</sup>, Fengli Chen<sup>3</sup>, Shouguo Wang<sup>1</sup>, Yue Xie<sup>1</sup>

<sup>1</sup>Department of Orthopedics, Huai'an First People's Hospital, Nanjing Medical University, Huai'an, China

<sup>2</sup>Department of Endocrinology, Huai'an First People's Hospital, Nanjing Medical University, Huai'an, China

<sup>3</sup>Clinical Laboratory, Huai'an First People's Hospital, Nanjing Medical University, Huai'an, China

\*Co-first authors

**Correspondence to:** Feng Ji, email: huaiaifengjdr@163.com

**Keywords:** icariside II, dexamethasone, EGFR-Akt, Nrf2 signaling, oxidative stress

**Received:** November 07, 2016

**Accepted:** November 21, 2016

**Published:** December 01, 2016

## ABSTRACT

The potential effect of icariside II on dexamethasone-induced osteoblast cell damages was evaluated here. In MC3T3-E1 osteoblastic cells and the primary murine osteoblasts, co-treatment with icariside II dramatically attenuated dexamethasone-induced cell death and apoptosis. Icariside II activated Akt signaling, which is required for its actions in osteoblasts. Akt inhibitors (LY294002, perifosine and MK-2206) almost abolished icariside II-induced osteoblast cytoprotection against dexamethasone. Further studies showed that icariside II activated Nrf2 signaling, downstream of Akt, to inhibit dexamethasone-induced reactive oxygen species (ROS) production in MC3T3-E1 cells and primary osteoblasts. On the other hand, Nrf2 shRNA knockdown inhibited icariside II-induced anti-dexamethasone cytoprotection in MC3T3-E1 cells. Finally, we showed that icariside II induced heparin-binding EGF (HB-EGF) production and EGFR trans-activation in MC3T3-E1 cells. EGFR inhibition, via anti-HB-EGF antibody, EGFR inhibitor AG1478 or EGFR shRNA knockdown, almost blocked icariside II-induced Akt-Nrf2 activation in MC3T3-E1 cells. Collectively, we conclude that icariside II activates EGFR-Akt-Nrf2 signaling and protects osteoblasts from dexamethasone. Icariside II might have translational value for the treatment of dexamethasone-associated osteoporosis/osteonecrosis.

## INTRODUCTION

Dexamethasone (Dex) is a common anti-inflammatory medicine that is utilized by a huge number of patients [1]. Yet, excessive Dex application could cause secondary osteoporosis [2, 3] and/or osteonecrosis [4]. Studies have shown that about one third of patients with long-term Dex treatment could suffer bone damages [2]. Osteoblast cell apoptosis was often observed in bones of the Dex-using patients [2–4]. *In vitro*, exogenously-added Dex could induce direct damages to the cultured osteoblastic cells and osteoblasts [5–10]. The research focus of our group [5–7] is to explore the signaling mechanisms of Dex-induced osteoblast cell death, and to develop potential intervention strategies.

Icariside II is one of the three main active components and a natural glycoside derived from Chinese medicine *E. Koreanum* [11, 12]. Existing evidences have shown that icariside II could exert a number of biological

functions under a number of experimental settings. For example, several studies have confirmed the pro-survival function of icariside II [13, 14]. Others, however, showed that icariside II may induce apoptosis in number of cancer cells [12, 15–17]. Whether icariside II could protect Dex-induced osteoblast cell damages has not been studied. And if so, the underlying signaling mechanisms are largely unknown. In the current study, we show that icariside II protects osteoblasts from Dex via activating epidermal growth factor receptor (EGFR)-Akt-NF-E2-related factor 2 (Nrf2) signaling.

## RESULTS

### Icariside II protects osteoblasts from Dex

In order to study the potential effect of icariside II on Dex-induced cytotoxicity in osteoblasts, MC3T3-E1 osteoblastic cells were treated with Dex (1  $\mu$ M) or

plus gradually increased concentration of icarisperide II (0.2–25  $\mu\text{M}$ ). Results demonstrated that icarisperide II, at 1–25  $\mu\text{M}$ , significantly attenuated Dex-induced MC3T3-E1 cell viability reduction (CCK-8 assay, Figure 1A), cell death (LDH release assay, Figure 1B) and apoptosis (Histone DNA ELISA assay, Figure 1C). Icarisperide II demonstrated a dose-dependent activity in protecting MC3T3-E1 cells from Dex (Figure 1A–1C). Of the tested concentrations, 5  $\mu\text{M}$  of icarisperide II efficiently inhibited Dex-induced cytotoxicity. This concentration was chosen for the following mechanistic studies. Treatment with icarisperide II (0.2–25  $\mu\text{M}$ ) alone failed to inhibit MC3T3-E1 cell survival (Figure 1D). We also tested icarisperide II's activity in the primary murine osteoblasts. As demonstrated, co-treatment with 5  $\mu\text{M}$  of icarisperide II in the primary murine osteoblasts dramatically attenuated Dex (1  $\mu\text{M}$ )-induced cell viability reduction (Figure 1E), cell death (Figure 1F) and apoptosis (Figure 1G). Icarisperide II alone again failed to inhibit survival of osteoblast cells (Figure 1E–1G). The results of these study clearly demonstrate that icarisperide II protects osteoblastic cells and primary osteoblasts from Dex.

### **Akt activation is required for icarisperide II-induced osteoblast cytoprotection against Dex**

Studies including ours [6, 7, 10, 18] have shown that activation of Akt, a major pro-survival signaling [19], could efficiently protect osteoblasts from Dex. We thus analyzed Akt signaling in icarisperide II-treated cells. Western blot assay results in Figure 2A demonstrated that icarisperide II treatment in MC3T3-E1 osteoblastic cells dose-dependently induced Akt activation, the latter was evidenced by phosphorylation of Akt (at Ser-473) and its major downstream GSK3 $\beta$  (at Ser-9) (see quantified results in Figure 2A). The expression of regular Akt1/2 and GSK3 $\beta$  was unchanged following the same icarisperide II treatment. To study the potential effect of Akt activation in icarisperide II-induced osteoblast cytoprotection against Dex, a panel of Akt inhibitors were applied, including the PI3K- Akt pan inhibitor LY294002, as well as the two Akt specific inhibitors perifosine [20] and MK-2206 [21]. As expected, treatment with these Akt inhibitors (LY294002, perifosine and MK-2206) blocked Akt activation by icarisperide II (5  $\mu\text{M}$ ) (Data not shown). More importantly, icarisperide II-induced anti-Dex cytoprotection was almost abolished with the presence of the Akt inhibitors in MC3T3-E1 cells (Figure 2B–2D). In the other words, icarisperide II was no longer effective or cytoprotective against Dex when Akt was blocked (Figure 2B–2D). In the primary murine osteoblasts, icarisperide II (5  $\mu\text{M}$ )-induced Akt activation, or Akt-GSK3 $\beta$  phosphorylation, was also blocked by LY294002 (see quantified results in Figure 2E). The latter almost abolished icarisperide II-induced anti-Dex actions in the primary cells (Figure 2F–2H). These results suggest that activation of Akt is required for icarisperide II-induced osteoblast cytoprotection against Dex.

### **Icarisperide II activates Nrf2 signaling and inhibits Dex-induced ROS production**

Growing evidences have shown that Dex induces reactive oxygen species (ROS) production and oxidative stress in osteoblasts, which cause subsequent cell damages [5, 22]. On the other hand, ROS inhibition could protect osteoblasts from Dex [22–24]. NF-E2-related factor 2 (Nrf2) signaling is a well-defined and potent anti-oxidant signaling [25, 26], and recent studies have proposed that Akt activation could function as a Nrf2 upstream signaling [27–29]. Therefore, Nrf2 signaling in icarisperide II-treated cells was tested here. Real-time quantitative PCR (RT-qPCR) assay results in Figure 3A demonstrated that icarisperide II dose-dependently increased transcription or mRNA expression of Nrf2-dictated genes, including *heme oxygenase-1* (*HO-1*) and *NAD [P] H: quinone oxidoreductase 1* (*NQO1*) [5, 22] in MC3T3-E1 cells. *HO-1* and *NQO1* protein expression was also increased with icarisperide II (1–25  $\mu\text{M}$ ) treatment (see quantified results in Figure 3B). Interestingly, Nrf2 mRNA was unchanged following the same icarisperide II treatment in MC3T3-E1 cells (Figure 3A). However, Nrf2 protein level was significantly increased (see quantified results in Figure 3B). These results indicate that icarisperide II induced Nrf2 stabilization, a necessary step for its activation [5, 22], which likely promoted transcription of Nrf2-dictated genes (*HO-1* and *NQO1*). Remarkably, icarisperide II (5  $\mu\text{M}$ ) significantly inhibited Dex-induced ROS production in MC3T3-E1 cells (Figure 3C). Very similar results were also achieved in the primary murine osteoblasts, where icarisperide II (5  $\mu\text{M}$ ) induced protein upregulation of Nrf2, *HO-1* and *NQO1* (see quantified results in Figure 3D) and inhibited Dex-induced oxidative stress (Figure 3E).

### **Nrf2 activation is required for icarisperide II-mediated anti-Dex actions in MC3T3-E1 cells**

The above results showed that icarisperide II activated Nrf2 signaling and inhibited Dex-induced cytotoxicity in osteoblasts. To further explore the link between the two, we applied shRNA method to knockdown Nrf2 in MC3T3-E1 cells. Western blot assay results in Figure 4A demonstrated that the two applied Nrf2 shRNAs (“shNrf2-a/-b”, with non-overlapping sequences) potently downregulated Nrf2 in MC3T3-E1 cells. Consequently, icarisperide II (5  $\mu\text{M}$ )-induced protein expression of *HO-1* and *NQO1* was also inhibited (Figure 4A). Meanwhile, *HO-1* and *NQO1* mRNA expression in icarisperide II-treated MC3T3-E1 cells was almost blocked with Nrf2 silence (Figure 4B and 4C). More importantly, icarisperide II (5  $\mu\text{M}$ )-induced ROS scavenging ability in Dex-treated MC3T3-E1 cells was almost abolished after Nrf2 shRNA knockdown (Figure 4D). These results confirm that icarisperide II-induced anti-oxidant activity indeed requires Nrf2 activation.

Next, we tested whether Nrf2 activation was also important for icaricide II-mediated cytoprotection against Dex. We showed that icaricide II (5  $\mu$ M)-induced pro-survival (Figure 4E) and anti-apoptosis (Figure 4F) activities against Dex were largely inhibited in Nrf2-silenced MC3T3-E1 cells. Thus, icaricide II-mediated osteoblast

cytoprotection was largely compromised with Nrf2 knockdown (Figure 4E and 4F). Intriguingly, when Nrf2 was silenced, Dex-induced cytotoxicity and apoptosis were also slightly but significantly increased in MC3T3-E1 cells (Figure 4E and 4F), indicating that basal Nrf2 activation is also important for Dex-resistance in osteoblastic cells.

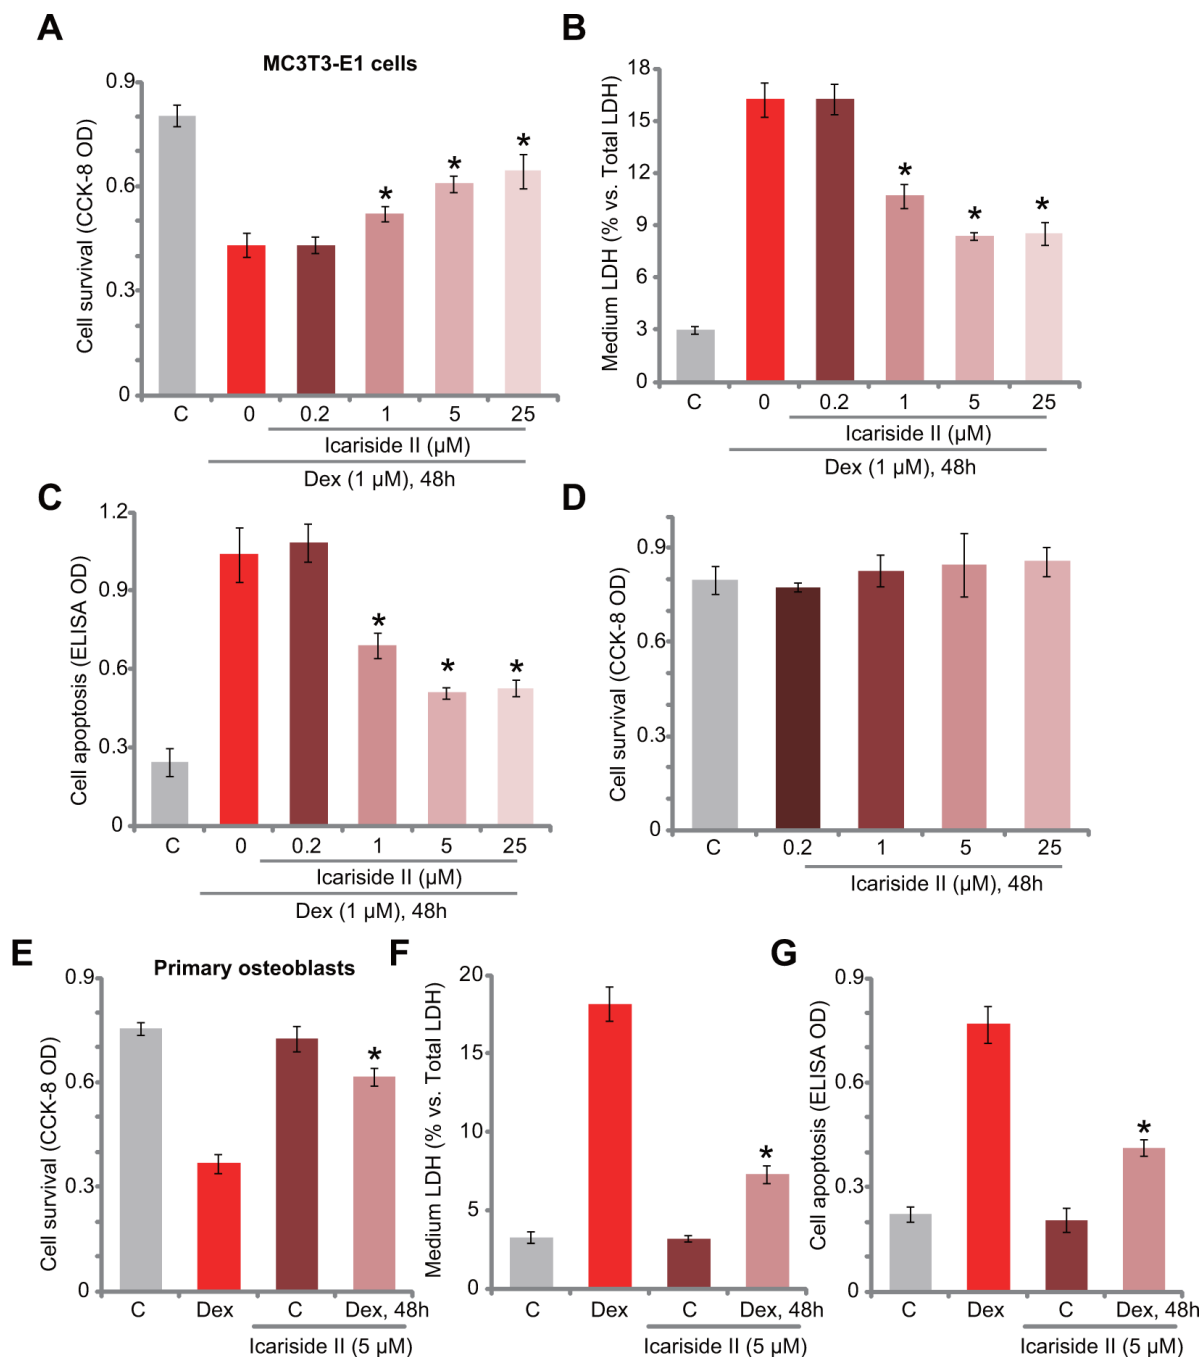

**Figure 1: Icaricide II protects osteoblasts from Dex.** MC3T3-E1 osteoblastic cells (A–D) or the primary murine osteoblasts (E–G) were treated with dexamethasone (“Dex”, 1  $\mu$ M) and/or indicated concentration of icaricide II (0.2–25  $\mu$ M), cells were then cultured in conditional medium for 48 hours; Cell survival was tested by the CCK-8 assay (A, D and E); Cell death was examined by the LDH release assay (B and F); Cell apoptosis was tested by the Histone DNA ELISA assay (C and G). Data are shown as mean ( $n = 5$ )  $\pm$  standard deviation (SD) (Same for all figures). “C” stands for untreated control (Same for all figures). Experiments in this figure were repeated for a total of five times, and similar results were obtained each time. \* $P < 0.05$  vs. Dex only group.

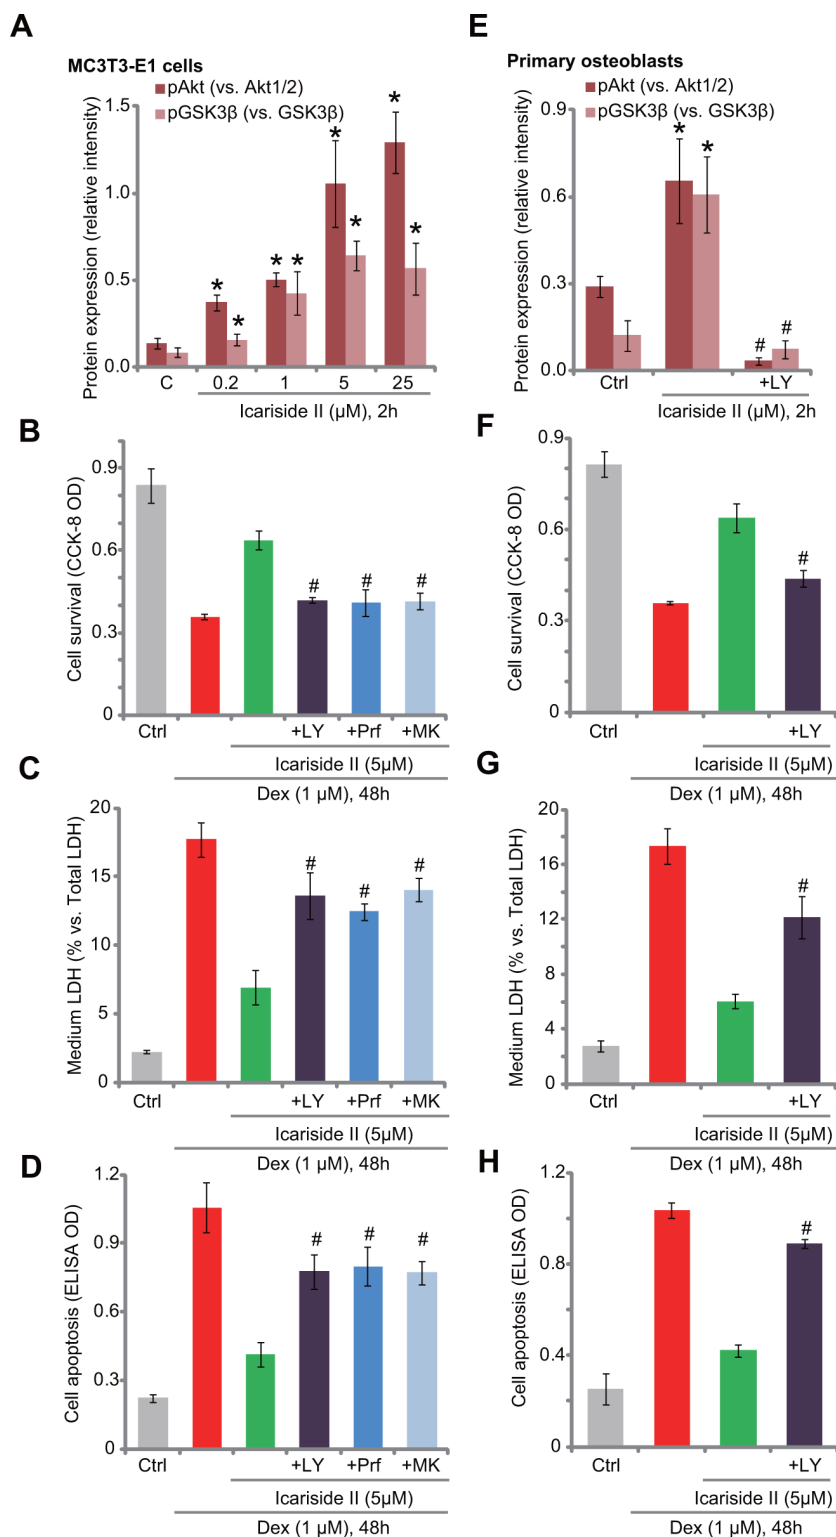

**Figure 2: Akt activation is required for icaricide II-induced osteoblast cytoprotection against Dex.** Expressions of Akt and GSK3β (phosphorylated and regular) in MC3T3-E1 osteoblastic cells and primary murine osteoblasts with designated treatment were tested by Western blot assay, and results of three repeats were quantified (A and E). MC3T3-E1 osteoblastic cells (B–D) or primary murine osteoblasts (F–H) were pre-treated for 30 min with listed Akt inhibitor: LY294002 (“+LY”, 500 nM), MK-2206 (“+MK”, 5 μM) or perifosine (“+Prf”, 5 μM), followed by icaricide II (5 μM) and dexamethasone (“Dex”, 1 μM) treatment, cells were then cultured in conditional medium for 48 hours; Cell survival was tested by the CCK-8 assay (B and F); Cell death was examined by the LDH release assay (C and G); Cell apoptosis was tested by the Histone DNA ELISA assay (D and H). Experiments in this figure were repeated for three times, and similar results were obtained each time. \**P* < 0.05 vs. “C” group. #*P* < 0.05 vs. icaricide II only group.

## EGFR trans-activation mediates icaricide II-induced Akt and Nrf2 activation in osteoblasts

At last, we tested the possible upstream signaling for icaricide II-induced Akt-Nrf2 activation. Several very recent studies have proposed that activation or trans-activation of epidermal growth factor receptor (EGFR) could protect osteoblasts from Dex [10, 18]. Thus, we tested EGFR signaling in icaricide II-treated MC3T3-E1 cells. We discovered that the content of HB-EGF (heparin-binding epidermal growth factor) was significantly increased following treatment of icaricide II (1–25  $\mu$ M) in MC3T3-E1 cells (Figure 5A). Meanwhile, Western blot assay results showed that icaricide II dose-dependently increased phosphorylation of EGFR at both Tyr-1068 and Tyr-1045, indicating significant EGFR activation (Figure 5B, quantified results of three repeats) [30]. Remarkably, blockage of EGFR activation, by the EGFR inhibitor AG1478 [31] or anti-HB-EGF monoclonal antibody [18], almost abolished icaricide II-induced Akt activation (Figure 5C) and Nrf2 accumulation (Figure 5D) in MC3T3-E1 cells. AG1478 and the Akt inhibitor LY294002 also inhibited *HO-1* and *NQO1* mRNA expression in icaricide II-treated cells (Figure 5E and 5F), suggesting that EGFR-Akt likely serves as the upstream signaling for icaricide II-induced Nrf2 signaling activation.

To further support the requirement of EGFR in icaricide II-induced actions, shRNA method was again applied to stably knockdown EGFR in MC3T3-E1 cells. The applied EGFR shRNA efficiently downregulated EGFR, and inhibited activation of EGFR-Akt (Figure 5G) and Nrf2 (Figure 5H) in MC3T3-E1 cells. Collectively, these results show that EGFR trans-activation mediates icaricide II-induced Akt and Nrf2 activation in osteoblasts.

## DISCUSSION

Dex could induce significant ROS production and oxidative stress in osteoblasts/osteoblastic cells, which

could be a major contributor of subsequent cell death [5, 7–9, 22]. As a matter of fact, several ROS scavengers were shown to block the above process and to efficiently rescue osteoblasts from Dex [5, 7, 8, 22]. For example, Guo *et al.*, showed that Compound 13 (C13) activates AMP-activated protein kinase (AMPK)-dependent signaling to inhibit Dex-induced oxidative stress and protect osteoblasts [5]. Fan *et al.*, showed that microRNA-135b (“miR-135b”) expression similarly provokes AMPK signaling to inhibit Dex-induced oxidative damages in osteoblasts [9]. In line with these findings, we show that icaricide II activated Akt downstream Nrf2 signaling to inhibit Dex-induced ROS production and osteoblast cell death. On the contrary, Nrf2 shRNA knockdown largely attenuated icaricide II-induced ROS clearance activity and almost abolished anti-Dex cytoprotection in osteoblasts. Therefore, Nrf2 activation and ROS scavenging could be the key mechanism responsible for icaricide II’s pro-survival actions in osteoblasts.

Nrf2 phosphorylation at Ser-40 is required for Nrf2 stabilization, nuclear translocation and activation by a number of stimuli [32, 33]. Recent studies have indicated that Akt and its downstream mTOR could be act as the upstream signaling for Nrf2 Ser-40 phosphorylation [29, 34, 35]. On the other hand, Akt-mTOR inhibition was shown to block Nrf2 Ser-40 phosphorylation and subsequent activation [29, 34, 35]. In the current study, we showed that icaricide II activated Akt-Nrf2 signaling in osteoblasts. More importantly, Akt inhibitor LY294002 almost blocked icaricide II-induced Nrf2 accumulation and mRNA expression of Nrf2-dictated genes (*HO-1* and *NQO1*). Therefore, Akt is very likely the upstream signaling of Nrf2 activation by icaricide II.

Besides being directly activated by the above ligands, EGFR may also be activated under a number of stimuli, the process known as “trans-activation” [36–40]. In the current study, we showed that EGFR-trans-activation could be a key upstream for icaricide II-induced actions in osteoblasts. Treatment of icaricide II induced significant

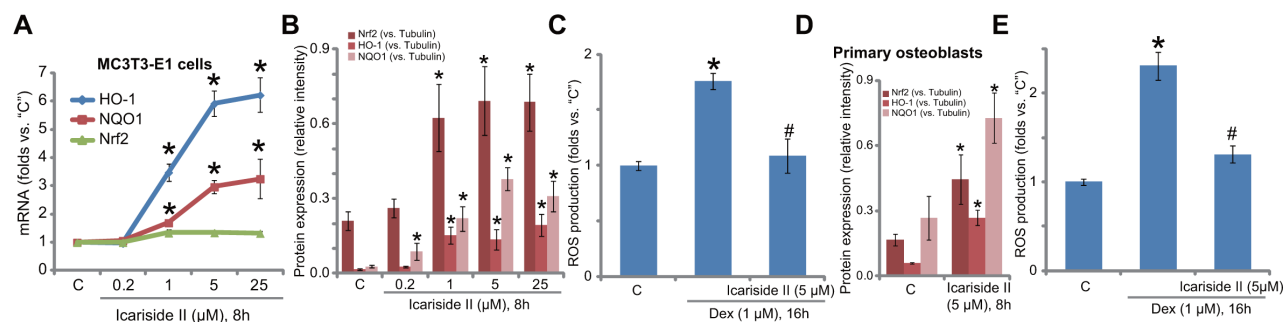

**Figure 3: Icaricide II activates Nrf2 signaling and inhibits Dex-induced ROS production.** MC3T3-E1 osteoblastic cells (A–C) or the primary murine osteoblasts (D–E) were treated with indicated concentration of icaricide II (0.2–25  $\mu$ M), or plus dexamethasone (“Dex”, 1  $\mu$ M), cells were cultured in the conditional medium for indicated time; mRNA (A) and protein (B and D, results of three repeats were quantified) expression of listed genes were shown; Relative ROS intensity was tested by the DCFH-DA fluorescent assay (C and E). Experiments in this figure were repeated for a total of three times, and similar results were obtained each time. \* $P < 0.05$  vs. “C” group. # $P < 0.05$  vs. Dex only group.

HB-EGF production, which trans-activated surface EGFR in MC3T3-E1 cells. Blockage of EGFR trans-activation, via anti-HB-EGF, AG1478 (the EGFR inhibitor) or introducing the EGFR shRNA, almost abolished icaride II-induced Akt-Nrf2 activation in MC3T3-E1 cells. These results are consistent with recent finding showing that activation of EGFR can protect osteoblasts from Dex. For example, *Fan*

*et al.*, showed that activation of EGFR-Akt-mTOR signaling mediates epiregulin-induced osteoblast cytoprotection against Dex [10]. Similarly, the same group showed that pleiotrophin trans-activates EGFR and significantly rescues osteoblasts from Dex [18]. Further studies will be needed to explore how icaride II induces HB-EGF production and EGFR trans-activation. It would also be interesting to explore

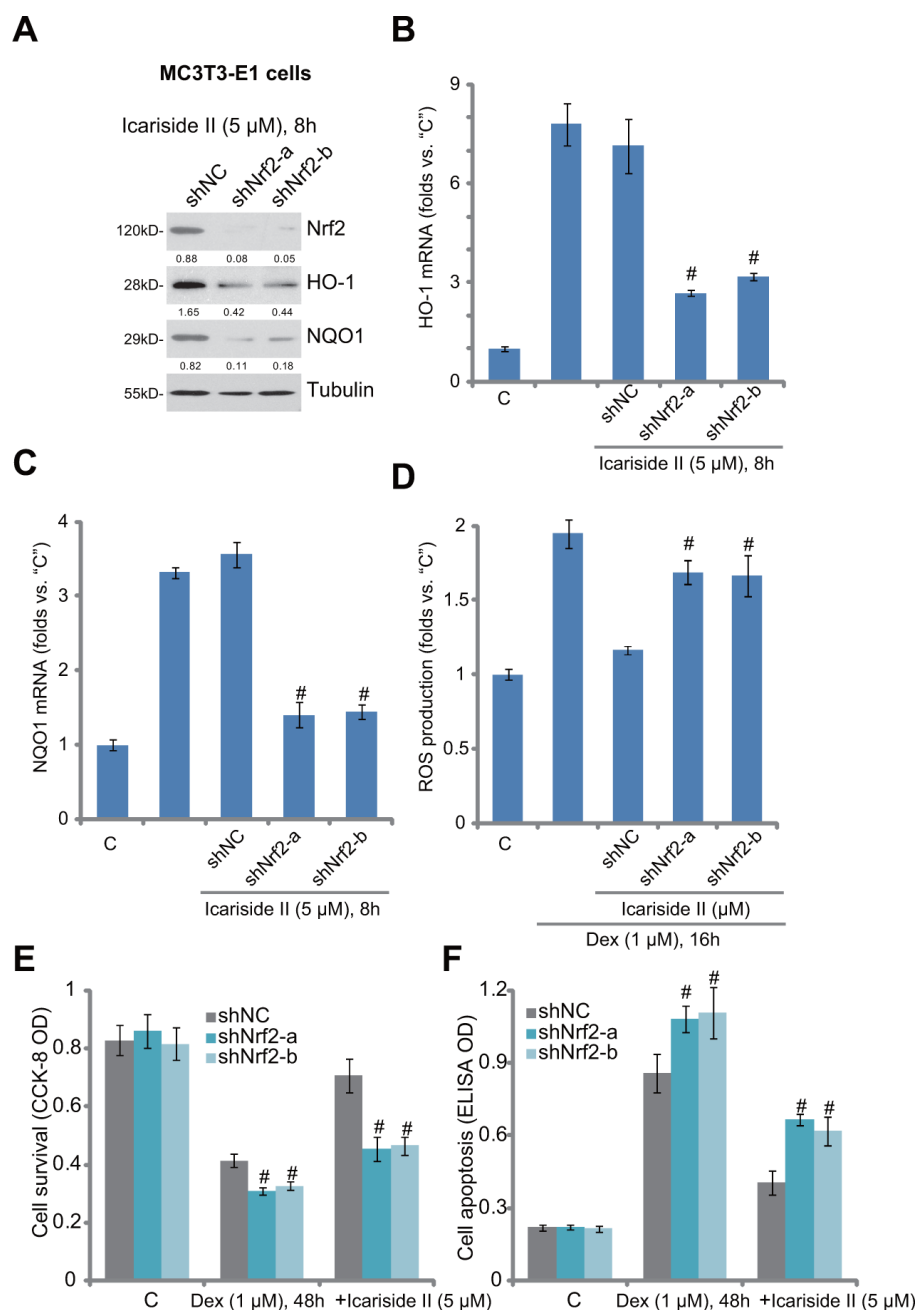

**Figure 4: Nrf2 activation is required for icaride II-mediated anti-Dex actions in MC3T3-E1 cells.** Puromycin-selected stable MC3T3-E1 cells, expressing non-sense control shRNA ("shNC") or Nrf2 shRNA ("shNrf2-a or -b"), were treated with icaride II (5 μM) or plus dexamethasone ("Dex", 1 μM), cells were further cultured in the conditional medium for applied time; Protein (A) and mRNA (B and C) expression of listed genes were shown; Relative ROS content was analyzed by the DCFH-DA fluorescent assay (D); Cell survival and apoptosis were tested by the CCK-8 assay (E) and Histone DNA apoptosis ELISA assay (F), respectively. Relative expression of listed proteins (vs. Tubulin) were quantified (A). Experiments in this figure were repeated for three times, and similar results were obtained each time. <sup>#</sup>*P* < 0.05 vs. "shNC" group.

whether EGFR also mediates other downstream signaling by icaricide II [11, 12].

## MATERIALS AND METHODS

### Chemicals and reagents

Icaricide II, Dex and LY294002 were purchased from Sigma Chemicals (St. Louis, MO). Perifosine and MK-2206 were obtained from Selleck (Shanghai, China). All the antibodies of this study were purchased from Cell Signaling Technology (Danvers, MA).

### MC3T3-E1 cell culture

The culture and differentiation of the murine osteoblastic MC3T3-E1 cells were described in our previous studies [5–7].

### Culture of primary murine osteoblasts

In brief, the calvariae of neonatal mice was isolated, washed, and digested [5–7]. Digestions were neutralized, pooled, and filtered as described [5–7]. The resulting primary murine osteoblasts were cultured as reported

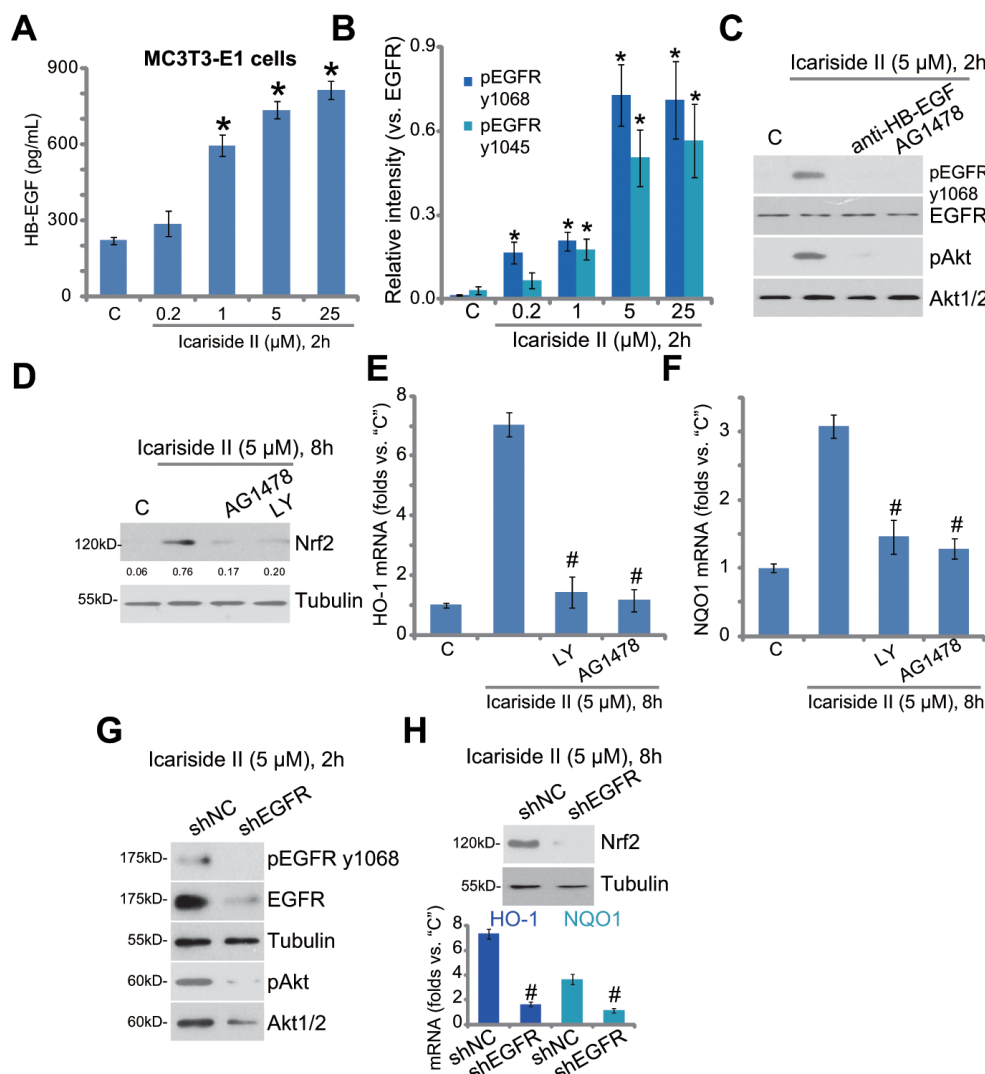

**Figure 5: EGFR trans-activation mediates icaricide II-induced Akt and Nrf2 activation in osteoblasts.** MC3T3-E1 cells were treated with indicated concentration of icaricide II (0.2–25 μM), cells were then cultured for indicated time; HB-EGF content in the conditional medium was evaluated by the ELISA assay (A); Expression of listed proteins was tested by the Western blot assay (B, results of three repeats were quantified). MC3T3-E1 cells, pretreated for 30 min with anti-HB-EGF (100 μg/mL), AG1478 (500 nM) or LY294001 ("LY", 500 nM), were treated with icaricide II (5 μM), cells were further cultured for designated time; Expression of listed proteins was shown (C and D); mRNA expression of *HO-1* (E) and *NQO1* (F) was also tested. Puromycin-selected MC3T3-E1 cells, expressing non-sense control shRNA ("shNC") or EGFR shRNA ("shEGFR"), were treated with icaricide II (5 μM) for indicated time; Protein or mRNA expression of listed genes were shown (G and H). Experiments in this figure were repeated for three times, and similar results were obtained each time. \**P* < 0.05 vs. "C" group. #*P* < 0.05 vs. icaricide II only group.

[5–7]. All animals were maintained in accordance with the guidelines of the NIH. The protocol is approved by IACUC of authors' institution.

### Cell survival assay

The Cell Counting Kit-8 (CCK-8, Dojindo Laboratories, Kumamoto, Japan) assay kit was utilized to test the survival of osteoblasts with indicated treatment [5–7].

### Cell apoptosis assay

The cell apoptosis histone-DNA ELISA plus kit (Roche, Palo Alto, CA) was utilized to quantify cell apoptosis in osteoblasts with indicated treatment, the detailed protocol was described previously [5–7].

### Cell death assay

As described in our previous studies [5–7], cell death was tested via medium release of lactate dehydrogenase (LDH), using a commercial available two-step LDH assay kit (Takara, Tokyo, Japan) [7].

### Western blots

Cellular protein lysates (30 µg per lane) were separated by the SDS-PAGE gels, and were transferred onto polyvinylidene difluoride (PVDF) membranes, which were blocked and incubated with indicated primary and secondary antibodies. Antibody-antigen binding was visualized through enhanced chemiluminescence (ECL, Pierce, Shanghai, China) reagents. The quantification of each Band was performed by the ImageJ software [5–7].

### shRNA

The two non-overlapping lentiviral shRNAs against murine Nrf2 were synthesized by Shanghai Genepharma Co. (Shanghai, China). The EGFR shRNA lentiviral particles were purchased from Santa Cruz Biotech (Shanghai, China). The lentiviral shRNA (10–15 µL/mL, per well) was added to cultured MC3T3-E1 cells (plated with 50% confluence) for 24 hours. Stable cells were selected by puromycin (0.5 µg/mL, Sigma) for 4–5 passages. Knockdown of targeted protein (EGFR or Nrf2) in the stable cells was confirmed by Western blot assay. The control MC3T3-E1 cells were infected with lentiviral scramble control shRNA (Santa Cruz).

### HB-EGF ELISA

After treatment of cells, the HB-EGF content in the conditional medium was tested by a commercial HB-EGF ELISA kit (Calbiochem, Suzhou, China)

### Reactive oxygen species (ROS) assay

ROS content in the cells was tested by a DCFH-DA fluorescent dye (Invitrogen, Shanghai, China). Briefly, after treatment, cells were incubated with 10 µM of DCFH-DA at room temperature for 30 min, which were and analyzed for fluorescence via a Fluorescence/Multi-Detection Microplate Reader (Synergy 2, BioTek, Winooski, VT). ROS intensity in the treatment group was expressed as fold change of that in the control group.

### RNA isolation and RT-PCR

Following treatment of cells, total cellular RNA was extracted through TRIzol reagents (Invitrogen, Shanghai, China). 500 ng of total RNA per sample was reverse-transcribed (RT) by the commercial RT-PCR kit (TOYOBO, Japan) according to the attached procedure. Real-time quantitative PCR (“RT-qPCR”) via SYBR green was performed in an ABI7300 machine (Applied Biosystems, Shanghai, China). The primers of Nrf2-associated genes, *Nrf2*, *HO-1* and *NQO1*, as well as *NADPH* were provided by Dr. Jiang's group [29, 34, 35].  $2^{-\Delta\Delta Ct}$  was then calculated to yield fold expression relative to *GAPDH*.

### Statistical analysis

Experiments were repeated at least three times and consistent results were always obtained. *p* values < 0.05 (one-way ANOVA) were considered statistically significant.

## CONCLUSIONS

Collectively, we conclude that icaricide II activates EGFR-Akt-Nrf2 signaling and protects osteoblasts from Dex. Icaricide II might have translational value for treatment of Dex-associated osteoporosis and osteonecrosis.

## ACKNOWLEDGMENTS AND FUNDING

This work is supported by the National Natural Science Foundation.

## CONFLICTS OF INTEREST

The listed authors have no conflicts of interests.

## Authors' contributions

All authors carried out the experiments, participated in the design of the study and performed the statistical analysis, participated in its design and coordination and helped to draft the manuscript.

## REFERENCES

- Schacke H, Docke WD, Asadullah K. Mechanisms involved in the side effects of glucocorticoids. *Pharmacol Ther.* 2002; 96:23–43.
- den Uyl D, Bultink IE, Lems WF. Advances in glucocorticoid-induced osteoporosis. *Curr Rheumatol Rep.* 2011; 13:233–240.
- Weinstein RS. Clinical practice. Glucocorticoid-induced bone disease. *N Engl J Med.* 2011; 365:62–70.
- Kerachian MA, Seguin C, Harvey EJ. Glucocorticoids in osteonecrosis of the femoral head: a new understanding of the mechanisms of action. *J Steroid Biochem Mol Biol.* 2009; 114:121–128.
- Guo S, Mao L, Ji F, Wang S, Xie Y, Fei H, Wang XD. Activating AMP-activated protein kinase by an  $\alpha$ 1 selective activator compound 13 attenuates dexamethasone-induced osteoblast cell death. *Biochem Biophys Res Commun.* 2016; 471:545–552.
- Guo S, Xie Y, Fan JB, Ji F, Wang S, Fei H.  $\alpha$ -Melanocyte stimulating hormone attenuates dexamethasone-induced osteoblast damages through activating melanocortin receptor 4-SphK1 signaling. *Biochem Biophys Res Commun.* 2016; 469:281–287.
- Ji F, Mao L, Liu Y, Cao X, Xie Y, Wang S, Fei H. K6PC-5, a novel sphingosine kinase 1 (SphK1) activator, alleviates dexamethasone-induced damages to osteoblasts through activating SphK1-Akt signaling. *Biochem Biophys Res Commun.* 2015; 458:568–575.
- Zhen YF, Wang GD, Zhu LQ, Tan SP, Zhang FY, Zhou XZ, Wang XD. P53 dependent mitochondrial permeability transition pore opening is required for dexamethasone-induced death of osteoblasts. *J Cell Physiol.* 2014; 229:1475–1483.
- Fan JB, Ruan JW, Liu W, Zhu LQ, Zhu XH, Yi H, Cui SY, Zhao JN, Cui ZM. miR-135b expression downregulates Ppm1e to activate AMPK signaling and protect osteoblastic cells from dexamethasone. *Oncotarget.* 2016; 7:70613–70622. doi: 10.18632/oncotarget.12138.
- Fan JB, Liu W, Zhu XH, Yuan K, Xu DW, Chen JJ, Cui ZM. EGFR-AKT-mTOR activation mediates epiregulin-induced pleiotropic functions in cultured osteoblasts. *Mol Cell Biochem.* 2015; 398:105–113.
- Chen M, Wu J, Luo Q, Mo S, Lyu Y, Wei Y, Dong J. The Anticancer Properties of Herba Epimedii and Its Main Bioactive Components icariin and Icariside II. *Nutrients.* 2016; 8.
- Khan M, Maryam A, Qazi JI, Ma T. Targeting Apoptosis and Multiple Signaling Pathways with Icariside II in Cancer Cells. *Int J Biol Sci.* 2015; 11:1100–1112.
- Cai WJ, Huang JH, Zhang SQ, Wu B, Kapahi P, Zhang XM, Shen ZY. Icariin and its derivative icariside II extend healthspan via insulin/IGF-I pathway in *C. elegans*. *PLoS One.* 2011; 6:e28835.
- Gu J, Sun X, Wang G, Li M, Chi M. Icariside II enhances Nrf2 nuclear translocation to upregulate phase II detoxifying enzyme expression coupled with the ERK, Akt and JNK signaling pathways. *Molecules.* 2011; 16:9234–9244.
- Huang C, Chen X, Guo B, Huang W, Shen T, Sun X, Xiao P, Zhou Q. Induction of apoptosis by Icariside II through extrinsic and intrinsic signaling pathways in human breast cancer MCF7 cells. *Biosci Biotechnol Biochem.* 2012; 76:1322–1328.
- Kim SH, Ahn KS, Jeong SJ, Kwon TR, Jung JH, Yun SM, Han I, Lee SG, Kim DK, Kang M, Chen CY, Lee JW. Janus activated kinase 2/signal transducer and activator of transcription 3 pathway mediates icariside II-induced apoptosis in U266 multiple myeloma cells. *Eur J Pharmacol.* 2011; 654:10–16.
- Lee KS, Lee HJ, Ahn KS, Kim SH, Nam D, Kim DK, Choi DY, Lu J. Cyclooxygenase-2/prostaglandin E2 pathway mediates icariside II induced apoptosis in human PC-3 prostate cancer cells. *Cancer Lett.* 2009; 280:93–100.
- Fan JB, Liu W, Yuan K, Zhu XH, Xu DW, Chen JJ, Cui ZM. EGFR trans-activation mediates pleiotrophin-induced activation of Akt and Erk in cultured osteoblasts. *Biochem Biophys Res Commun.* 2014; 447:425–430.
- Song G, Ouyang G, Bao S. The activation of Akt/PKB signaling pathway and cell survival. *J Cell Mol Med.* 2005; 9:59–71.
- Kondapaka SB, Singh SS, Dasmahapatra GP, Sausville EA, Roy KK. Perifosine, a novel alkylphospholipid, inhibits protein kinase B activation. *Mol Cancer Ther.* 2003; 2:1093–1103.
- Hirai H, Sootome H, Nakatsuru Y, Miyama K, Taguchi S, Tsujioka K, Ueno Y, Hatch H, Majumder PK, Pan BS, Kotani H. MK-2206, an allosteric Akt inhibitor, enhances antitumor efficacy by standard chemotherapeutic agents or molecular targeted drugs *in vitro* and *in vivo*. *Mol Cancer Ther.* 2010; 9:1956–1967.
- Almeida M, Han L, Ambrogini E, Weinstein RS, Manolagas SC. Glucocorticoids and tumor necrosis factor  $\alpha$  increase oxidative stress and suppress Wnt protein signaling in osteoblasts. *J Biol Chem.* 2011; 286:44326–44335.
- Sato AY, Tu X, McAndrews KA, Plotkin LI, Bellido T. Prevention of glucocorticoid induced-apoptosis of osteoblasts and osteocytes by protecting against endoplasmic reticulum(ER) stress *in vitro* and *in vivo* in female mice. *Bone.* 2015; 73C:60–68.
- Plotkin LI, Manolagas SC, Bellido T. Glucocorticoids induce osteocyte apoptosis by blocking focal adhesion kinase-mediated survival. Evidence for inside-out signaling leading to anoikis. *J Biol Chem.* 2007; 282:24120–24130.
- Suzuki T, Yamamoto M. Molecular basis of the Keap1-Nrf2 system. *Free Radic Biol Med.* 2015; 88:93–100.
- Nguyen T, Nioi P, Pickett CB. The Nrf2-antioxidant response element signaling pathway and its activation by oxidative stress. *J Biol Chem.* 2009; 284:13291–13295.
- Zheng K, Sheng Z, Li Y, Lu H. Salidroside inhibits oxygen glucose deprivation (OGD)/re-oxygenation-induced H9c2

- cell necrosis through activating of Akt-Nrf2 signaling. *Biochem Biophys Res Commun*. 2014; 451:79–85.
28. Papaiahgari S, Zhang Q, Kleeberger SR, Cho HY, Reddy SP. Hyperoxia stimulates an Nrf2-ARE transcriptional response via ROS-EGFR-PI3K-Akt/ERK MAP kinase signaling in pulmonary epithelial cells. *Antioxid Redox Signal*. 2006; 8:43–52.
  29. Gong YQ, Huang W, Li KR, Liu YY, Cao GF, Cao C, Jiang Q. SC79 protects retinal pigment epithelium cells from UV radiation via activating Akt-Nrf2 signaling. *Oncotarget*. 2016; 7:60123–60132. doi: 10.18632/oncotarget.11164.
  30. Lurje G, Lenz HJ. EGFR signaling and drug discovery. *Oncology*. 2009; 77:400–410.
  31. Zhu XF, Liu ZC, Xie BF, Li ZM, Feng GK, Yang D, Zeng YX. EGFR tyrosine kinase inhibitor AG1478 inhibits cell proliferation and arrests cell cycle in nasopharyngeal carcinoma cells. *Cancer Lett*. 2001; 169:27–32.
  32. Huang HC, Nguyen T, Pickett CB. Phosphorylation of Nrf2 at Ser-40 by protein kinase C regulates antioxidant response element-mediated transcription. *J Biol Chem*. 2002; 277:42769–42774.
  33. Gu DM, Lu PH, Zhang K, Wang X, Sun M, Chen GQ, Wang Q. EGFR mediates astragaloside IV-induced Nrf2 activation to protect cortical neurons against *in vitro* ischemia/reperfusion damages. *Biochem Biophys Res Commun*. 2015; 457:391–397.
  34. Zhang H, Liu YY, Jiang Q, Li KR, Zhao YX, Cao C, Yao J. Salvianolic acid A protects RPE cells against oxidative stress through activation of Nrf2/HO-1 signaling. *Free Radic Biol Med*. 2014; 69:219–228.
  35. Li KR, Yang SQ, Gong YQ, Yang H, Li XM, Zhao YX, Yao J, Jiang Q, Cao C. 3H-1,2-dithiole-3-thione protects retinal pigment epithelium cells against Ultra-violet radiation via activation of Akt-mTORC1-dependent Nrf2-HO-1 signaling. *Sci Rep*. 2016; 6:25525.
  36. Cao C, Lu S, Jiang Q, Wang WJ, Song X, Kivlin R, Wallin B, Bagdasarian A, Tamakloe T, Chu WM, Marshall J, Kouttab N, Xu A, Wan Y. EGFR activation confers protections against UV-induced apoptosis in cultured mouse skin dendritic cells. *Cell Signal*. 2008; 20:1830–1838.
  37. Maretzky T, Evers A, Zhou W, Swendeman SL, Wong PM, Rafii S, Reiss K, Blobel CP. Migration of growth factor-stimulated epithelial and endothelial cells depends on EGFR transactivation by ADAM17. *Nat Commun*. 2011; 2:229.
  38. Oganessian A, Yarov-Yarovoy V, Parks WC, Schwinn DA. Constitutive coupling of a naturally occurring human alpha1A-adrenergic receptor genetic variant to EGFR transactivation pathway. *Proc Natl Acad Sci U S A*. 2011; 108:19796–19801.
  39. Sur S, Agrawal DK. Transactivation of EGFR by G protein-coupled Receptor in the Pathophysiology of Intimal Hyperplasia. *Curr Vasc Pharmacol*. 2014.
  40. McElroy SJ, Hobbs S, Kallen M, Tejera N, Rosen MJ, Grishin A, Matta P, Schneider C, Upperman J, Ford H, Polk DB, Weitkamp JH. Transactivation of EGFR by LPS induces COX-2 expression in enterocytes. *PLoS One*. 2012; 7:e38373.
